# Supplementary material for: Self-learning entropic population annealing for interpretable materials design
Source: Royal Society of Chemistry journal article supplement (doi:10.1039/d1dd00043h), 2022-01-01
Supplement: d1dd00043h1.pdf [file d1dd00043h1.pdf]

## Supplementary Information

### Self-learning Entropic Population Annealing for Interpretable Materials

#### Design

Jiawen Li<sup>1</sup>, Jinzhe Zhang<sup>1</sup>, Ryo Tamura<sup>\*1,2,3,4</sup>, and Koji Tsuda<sup>\*1,3,4</sup>

*1 Graduate School of Frontier Sciences, The University of Tokyo, 5-1-5 Kashiwa-no-ha, Kashiwa, Chiba 277-8561, Japan*

*2 International Center for Materials Nanoarchitectonics (WPI-MANA), National Institute for Materials Science, 1-1 Namiki, Tsukuba, Ibaraki 305-0044, Japan*

*3 Research and Services Division of Materials Data and Integrated System, National Institute for Materials Science, 1-1 Namiki, Tsukuba, Ibaraki 305-0044, Japan*

*4 RIKEN Center for Advanced Intelligence Project, 1-4-1 Nihonbashi, Chuo-ku, Tokyo 103-0027, Japan*

## Dependency on number of iterations and inverse temperatures

In SLEPA and EPA, some hyperparameters are existed. In this supplementary note, we address dependencies on number of iterations  $\tau$  and the maximum inverse temperature  $\beta_{\max}$  when the number of observations is fixed. If  $\tau$  is changed, the number of particles  $M$  should be changed to fix the number of observations. Figure S1 shows the Hellinger distance of the residue distribution to the ground truth distribution depending on  $\tau$ ,  $M$ , and  $\beta_{\max}$ . First, for our problems,  $\beta_{\max} = 10$  is the best choice for the small percentile cases. If SLEPA is used, when the number of observations is small (i.e., 1000 and 4000), the value of  $\tau$  should be increased instead of  $M$  to obtain better results. When the number of observations is large enough as 20000, the dependency on  $\tau$  and  $M$  is not observed for SLEPA. On the other hand, for EPA, the opposite situation is preferred, that is,  $M$  should be increased than  $\tau$ . Thus, we confirm that  $\tau = 20$  used in the main text shows relatively better results for both SLEPA and EPA. Furthermore, if the any values of  $\tau$  and  $M$  are used, the results by SLEPA are better than those by EPA for small percentile cases when  $\beta_{\max} = 10$ . Note that the optimum value of  $\beta_{\max}$  strongly depends on the problem, in particular the energy value,  $e(\mathbf{x})$ .

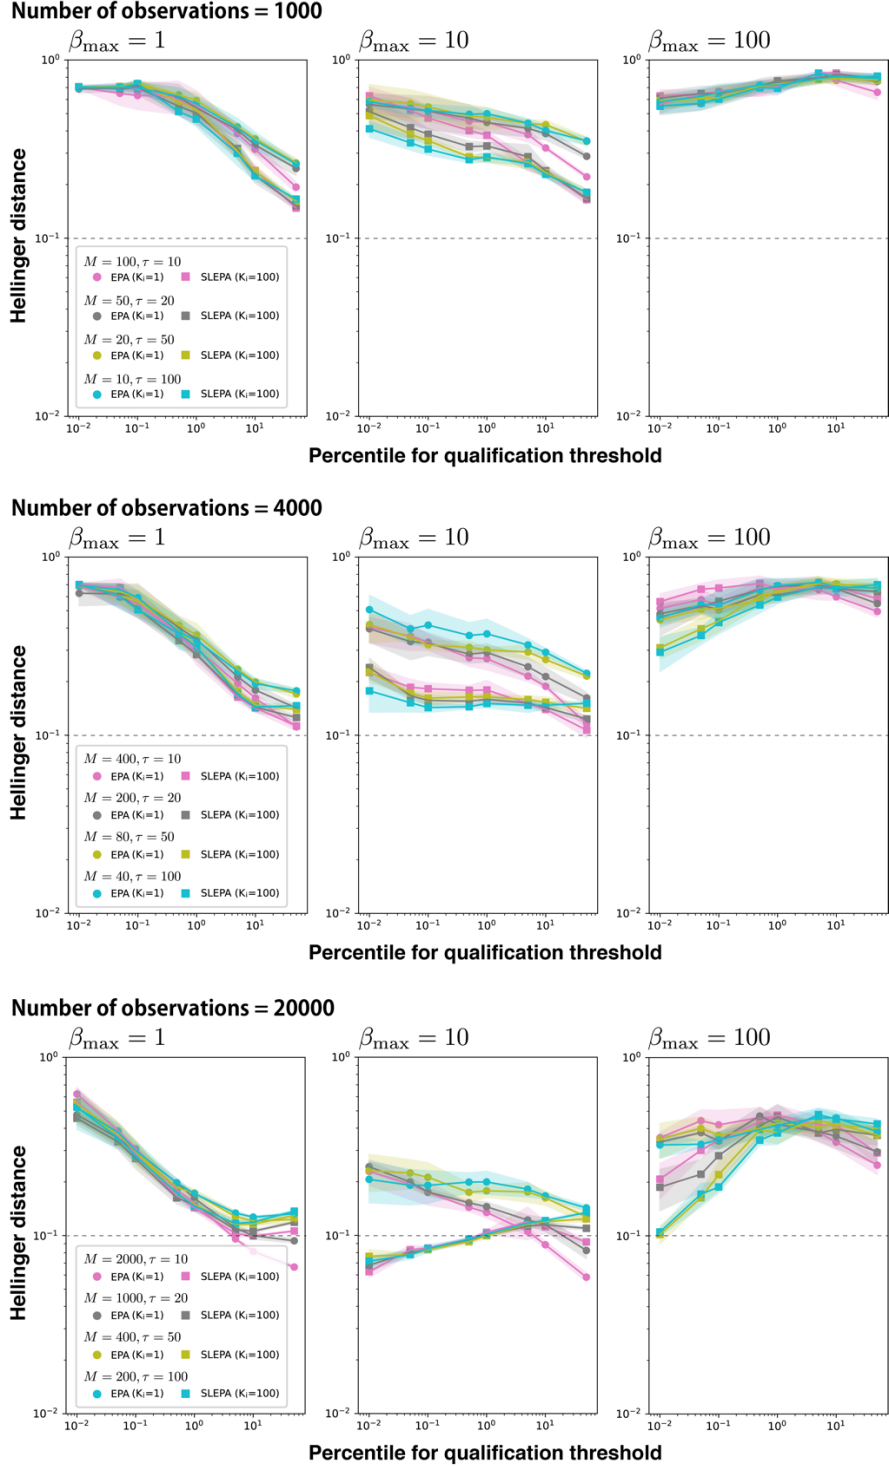

**Fig. S1.** Hellinger distance of the residue distribution to the ground truth distribution against the qualification threshold depending on the number of observations. Dependencies on numbers of particles  $M$  and iterations  $\tau$  and  $\beta_{\max}$  are summarized when  $\beta_{\min}$  is fixed as 0.
